# Supplementary material for: CUB domain-containing protein 1 and the epidermal growth factor receptor cooperate to induce cell detachment
Source: Springer Nature journal article supplement (doi:10.1186/s13058-016-0741-1), 2016-08-05
Supplement: MOESM1 [file 10561622]

|          |     |      |      |                                                      |           |       |           |         |    |    |    |        |        |                     |   |   |        |      |      |      |   |   |   |   |   |          |     |     |       |                                  |
|----------|-----|------|------|------------------------------------------------------|-----------|-------|-----------|---------|----|----|----|--------|--------|---------------------|---|---|--------|------|------|------|---|---|---|---|---|----------|-----|-----|-------|----------------------------------|
| 20120641 | law | law3 | law3 | law3 (F098 Tubulin alpha-1A chain                    | IP0018061 | human | 50,135.70 | 99.80%  | 2  | 2  | 2  | 0.62%  | 46.80% | FDLAMYK             | K | R | 94.30% | 36.4 | 39.1 | 20.7 | 0 | 1 | 0 | 0 | 2 | 887,4332 | 395 | 401 | FALSE | IP00030688                       |
| 20120641 | law | law3 | law3 | law3 (F098 Tubulin alpha-1A chain                    | IP0018061 | human | 50,135.70 | 99.80%  | 2  | 2  | 2  | 0.62%  | 46.80% | HFPLATVPASVAK       | R | A | 95.00% | 51.5 | 37.8 | 39.5 | 0 | 0 | 1 | 0 | 2 | 1,756.96 | 265 | 280 | FALSE | IP00030688                       |
| 20120641 | law | law3 | law3 | law3 (F098 Tubulin alpha-1A chain                    | IP0018061 | human | 50,135.70 | 99.80%  | 2  | 2  | 2  | 0.62%  | 46.80% | LQWVDFEYK           | R | B | 95.00% | 59.2 | 38.1 | 39.1 | 0 | 0 | 0 | 0 | 2 | 1,380.70 | 352 | 367 | TRUE  | IP00030688                       |
| 20120641 | law | law3 | law3 | law3 (F098 Tubulin alpha-1A chain                    | IP0018061 | human | 50,135.70 | 99.80%  | 2  | 2  | 2  | 0.62%  | 46.80% | ISQVSVISATLR        | R | F | 95.00% | 93.2 | 38.1 | 82.1 | 0 | 1 | 0 | 0 | 2 | 1,457.87 | 230 | 243 | TRUE  | IP00030688                       |
| 20120641 | law | law3 | law3 | law3 (F098 Tubulin alpha-1A chain                    | IP0018061 | human | 50,135.70 | 99.80%  | 2  | 2  | 2  | 0.62%  | 46.80% | NLDIERPTNLLNR       | R | L | 95.00% | 47.3 | 38.8 | 28.7 | 0 | 0 | 0 | 0 | 2 | 1,718.88 | 216 | 229 | FALSE | IP00030688                       |
| 20120641 | law | law3 | law3 | law3 (F098 Tubulin alpha-1A chain                    | IP0018061 | human | 50,135.70 | 99.80%  | 2  | 2  | 2  | 0.62%  | 46.80% | QVDFEYK             | R | G | 95.00% | 46.5 | 37.9 | 44.5 | 0 | 0 | 0 | 0 | 2 | 1,410.79 | 85  | 85  | FALSE | IP00030688                       |
| 20120641 | law | law3 | law3 | law3 (F098 Tubulin alpha-1A chain                    | IP0018061 | human | 50,135.70 | 99.80%  | 2  | 2  | 2  | 0.62%  | 46.80% | QLHFELQIGKEDAMANNAR | R | G | 95.00% | 72.8 | 37.4 | 53.4 | 0 | 0 | 0 | 0 | 2 | 2,415.21 | 85  | 105 | FALSE | IP00030688                       |
| 20120641 | law | law3 | law3 | law3 (F098 Tubulin alpha-1A chain                    | IP0018061 | human | 50,135.70 | 99.80%  | 2  | 2  | 2  | 0.62%  | 46.80% | TGGGDDQFFTSFETGAKG  | K | H | 95.00% | 154  | 37.4 | 34.3 | 0 | 0 | 0 | 0 | 2 | 2,007.89 | 41  | 60  | FALSE | IP00030688                       |
| 20120641 | law | law3 | law3 | law3 (F098 Tubulin alpha-1A chain                    | IP0018061 | human | 50,135.70 | 99.80%  | 2  | 2  | 2  | 0.62%  | 46.80% | VGNVPPYVGGDLK       | R | V | 95.00% | 52.7 | 38.1 | 47.0 | 0 | 0 | 0 | 0 | 2 | 1,598.77 | 340 | 352 | TRUE  | IP00030688                       |
| 20120641 | law | law3 | law3 | law3 (F098 Tubulin alpha-1A chain                    | IP0018061 | human | 50,135.70 | 99.80%  | 2  | 2  | 2  | 0.62%  | 46.80% | GVGNVPPYVGGDLK      | R | V | 95.00% | 73.4 | 37.7 | 54.6 | 0 | 0 | 0 | 0 | 2 | 1,824.59 | 353 | 370 | TRUE  | IP00030688                       |
| 20120641 | law | law3 | law3 | law3 (F098 Tubulin alpha-1A chain                    | IP0018061 | human | 50,135.70 | 99.80%  | 2  | 2  | 2  | 0.62%  | 46.80% | YMAACLIVL           | K | G | 95.00% | 55.6 | 38.3 | 51.5 | 0 | 0 | 0 | 0 | 2 | 1,249.55 | 312 | 320 | FALSE | IP00030688                       |
| 20120641 | law | law3 | law3 | law3 (F098 Keratin, type I cytoskeletal 8            | IP0055464 | human | 53,706.20 | 100.00% | 10 | 10 | 10 | 3.11%  | 20.30% | AGVADHNR            | K | S | 95.00% | 39.1 | 38.3 | 28.6 | 0 | 0 | 0 | 0 | 2 | 1,079.51 | 265 | 273 | TRUE  | IP00030688                       |
| 20120641 | law | law3 | law3 | law3 (F098 Keratin, type II cytoskeletal 8           | IP0055464 | human | 53,706.20 | 100.00% | 3  | 3  | 3  | 0.93%  | 6.41%  | AVLVEFGTMDSVR       | K | V | 95.00% | 61.8 | 38.1 | 64.8 | 0 | 0 | 0 | 0 | 2 | 1,249.68 | 329 | 344 | TRUE  | IP00030688                       |
| 20120641 | law | law3 | law3 | law3 (F098 Keratin, type II cytoskeletal 8           | IP0055464 | human | 53,706.20 | 100.00% | 10 | 10 | 10 | 3.11%  | 20.30% | FASFDIK             | K | F | 95.00% | 43.1 | 37.2 | 0    | 0 | 0 | 0 | 0 | 2 | 827.428  | 102 | 108 | TRUE  | IP00106659;IP01021185;IP00792841 |
| 20120641 | law | law3 | law3 | law3 (F098 Keratin, type II cytoskeletal 8           | IP0055464 | human | 53,706.20 | 100.00% | 10 | 10 | 10 | 3.11%  | 20.30% | FASTDKIVR           | K | F | 95.00% | 50   | 38   | 0    | 0 | 0 | 0 | 0 | 2 | 1,082.60 | 102 | 110 | TRUE  | IP00106659;IP01021185;IP00792841 |
| 20120641 | law | law3 | law3 | law3 (F098 Keratin, type II cytoskeletal 8           | IP0055464 | human | 53,706.20 | 100.00% | 10 | 10 | 10 | 3.11%  | 20.30% | LEGTDENRVR          | R | Q | 95.00% | 45.4 | 38.3 | 55.5 | 0 | 0 | 0 | 0 | 2 | 1,419.75 | 214 | 225 | TRUE  | IP00106659;IP01021185;IP00792841 |
| 20120641 | law | law3 | law3 | law3 (F098 Keratin, type II cytoskeletal 8           | IP0055464 | human | 53,706.20 | 100.00% | 10 | 10 | 10 | 3.11%  | 20.30% | LQAEIQLGKGR         | R | A | 95.00% | 46.2 | 38.2 | 32.4 | 0 | 0 | 0 | 0 | 2 | 1,341.75 | 317 | 328 | TRUE  | IP00106659;IP01021185;IP00792841 |
| 20120641 | law | law3 | law3 | law3 (F098 Keratin, type II cytoskeletal 8           | IP0055464 | human | 53,706.20 | 100.00% | 10 | 10 | 10 | 3.11%  | 20.30% | LVSSGDLVK           | K | - | 95.00% | 52.3 | 38.8 | 37.5 | 0 | 0 | 0 | 0 | 2 | 1,173.64 | 473 | 483 | TRUE  | IP00106659;IP01021185;IP00792841 |
| 20120641 | law | law3 | law3 | law3 (F098 Keratin, type II cytoskeletal 8           | IP0055464 | human | 53,706.20 | 100.00% | 10 | 10 | 10 | 3.11%  | 20.30% | SLMDSDIWK           | R | A | 95.00% | 73.1 | 38.4 | 63.5 | 0 | 0 | 0 | 0 | 2 | 1,320.67 | 253 | 264 | TRUE  | IP00106659;IP01021185;IP00792841 |
| 20120641 | law | law3 | law3 | law3 (F098 Keratin, type II cytoskeletal 8           | IP0055464 | human | 53,706.20 | 100.00% | 10 | 10 | 10 | 3.11%  | 20.30% | TKTSEDMNR           | R | N | 95.00% | 39.2 | 38   | 29.5 | 0 | 0 | 0 | 0 | 2 | 1,224.59 | 303 | 312 | TRUE  | IP00106659;IP01021185;IP00792841 |
| 20120641 | law | law3 | law3 | law3 (F098 Keratin, type II cytoskeletal 8           | IP0055464 | human | 53,706.20 | 100.00% | 10 | 10 | 10 | 3.11%  | 20.30% | YEELQSAKG           | K | H | 95.00% | 36.6 | 38.3 | 12.5 | 0 | 0 | 0 | 0 | 2 | 1,137.58 | 286 | 295 | TRUE  | IP00106659;IP01021185;IP00792841 |
| 20120641 | law | law3 | law3 | law3 (F098 Fatty acyl-CoA reductase 1                | IP0047881 | human | 59,358.20 | 100.00% | 3  | 3  | 3  | 0.93%  | 6.41%  | AVLVEFGTMDSVR       | K | L | 95.00% | 96.7 | 38.2 | 77.1 | 0 | 0 | 0 | 0 | 2 | 1,405.73 | 209 | 221 | TRUE  | IP00106659;IP01021185;IP00792841 |
| 20120641 | law | law3 | law3 | law3 (F098 Fatty acyl-CoA reductase 1                | IP0047881 | human | 59,358.20 | 100.00% | 3  | 3  | 3  | 0.93%  | 6.41%  | AVLVEFGTMDSVR       | K | V | 95.00% | 87.2 | 38.3 | 64   | 0 | 0 | 0 | 0 | 2 | 1,290.74 | 12  | 24  | TRUE  | IP00106659;IP01021185;IP00792841 |
| 20120641 | law | law3 | law3 | law3 (F098 Fatty acyl-CoA reductase 1                | IP0047881 | human | 59,358.20 | 100.00% | 3  | 3  | 3  | 0.93%  | 6.41%  | TNFDVR              | K | Q | 95.00% | 36.7 | 38.9 | 27.6 | 0 | 0 | 0 | 0 | 2 | 864.574  | 420 | 426 | TRUE  | IP00106659;IP01021185;IP00792841 |
| 20120641 | law | law3 | law3 | law3 (F098 Isoform 1 of PDZ and LIM domain protein 7 | IP0002312 | human | 49,844.00 | 100.00% | 4  | 4  | 4  | 1.24%  | 9.85%  | ASAPAAPPR           | K | Y | 95.00% | 38.3 | 37.7 | 25.5 | 0 | 0 | 0 | 0 | 2 | 952.4497 | 94  | 103 | TRUE  | IP00106659;IP01021185;IP00792841 |
| 20120641 | law | law3 | law3 | law3 (F098 Isoform 1 of PDZ and LIM domain protein 7 | IP0002312 | human | 49,844.00 | 100.00% | 4  | 4  | 4  | 1.24%  | 9.85%  | VLEEGFEEK           | K | G | 95.00% | 44.7 | 37.9 | 25.7 | 0 | 0 | 0 | 0 | 2 | 1,283.62 | 314 | 324 | TRUE  | IP00106659;IP01021185;IP00792841 |
| 20120641 | law | law3 | law3 | law3 (F098 Isoform 1 of PDZ and LIM domain protein 7 | IP0002312 | human | 49,844.00 | 100.00% | 4  | 4  | 4  | 1.24%  | 9.85%  | YVTFVPSLNK          | K | T | 95.00% | 39.5 | 37.8 | 31.4 | 0 | 0 | 0 | 0 | 2 | 1,226.64 | 104 | 114 | TRUE  | IP00106659;IP01021185;IP00792841 |
| 20120641 | law | law3 | law3 | law3 (F098 Tubulin beta chain                        | IP0101911 | human | 49,670.00 | 100.00% | 23 | 23 | 23 | 10.20% | 56.10% | AVLVEFGTMDSVR       | R | N | 95.00% | 69.7 | 38.0 | 56.7 | 0 | 0 | 0 | 0 | 2 | 1,633.83 | 6   | 77  | TRUE  | IP00007752                       |
| 20120641 | law | law3 | law3 | law3 (F098 Tubulin beta chain                        | IP0101911 | human | 49,670.00 | 100.00% | 23 | 23 | 23 | 10.20% | 56.10% | ALVPELQVDFYAK       | R | N | 95.00% | 75.5 | 38   | 58.5 | 0 | 0 | 0 | 0 | 2 | 1,659.90 | 283 | 297 | TRUE  | IP00007752                       |
| 20120641 | law | law3 | law3 | law3 (F098 Tubulin beta chain                        | IP0101911 | human | 49,670.00 | 100.00% | 23 | 23 | 23 | 10.20% | 56.10% | EVVHLQAGCGNGGAK     | K | F | 95.00% | 96.1 | 37.9 | 0    | 0 | 0 | 0 | 0 | 2 | 1,822.92 | 3   | 19  | FALSE | IP00007752                       |
| 20120641 | law | law3 | law3 | law3 (F098 Tubulin beta chain                        | IP0101911 | human | 49,670.00 | 100.00% | 23 | 23 | 23 | 10.20% | 56.10% | EVVQIQLMNVNQK       | K | N | 95.00% | 90.2 | 38.3 | 66.7 | 0 | 0 | 0 | 0 | 2 | 1,462.68 | 325 | 336 | TRUE  | IP00007752                       |
| 20120641 | law | law3 | law3 | law3 (F098 Tubulin beta chain                        | IP0101911 | human | 49,670.00 | 100.00% | 23 | 23 | 23 | 10.20% | 56.10% | FGQGLNADLR          | K | K | 95.00% | 67.7 | 38.1 | 46.2 | 0 | 0 | 0 | 0 | 2 | 1,310.40 | 242 | 252 | FALSE | IP00007752                       |
| 20120641 | law | law3 | law3 | law3 (F098 Tubulin beta chain                        | IP0101911 | human | 49,670.00 | 100.00% | 23 | 23 | 23 | 10.20% | 56.10% | FGQGLNADLR          | K | L | 95.00% | 48.8 | 38.5 | 33.7 | 0 | 0 | 0 | 0 | 2 | 1,258.69 | 242 | 252 | TRUE  | IP00007752                       |
| 20120641 | law | law3 | law3 | law3 (F098 Tubulin beta chain                        | IP0101911 | human | 49,670.00 | 100.00% | 23 | 23 | 23 | 10.20% | 56.10% | GHTEGAELQVSLDLVLR   | K | K | 95.00% | 76.6 | 37.5 | 65.5 | 0 | 0 | 0 | 0 | 2 | 1,958.98 | 104 | 121 | TRUE  | IP00007752                       |
| 20120641 | law | law3 | law3 | law3 (F098 Tubulin beta chain                        | IP0101911 | human | 49,670.00 | 100.00% | 23 | 23 | 23 | 10.20% | 56.10% | GHTEGAELQVSLDLVLR   | K | K | 95.00% | 68.9 | 38.7 | 61.7 | 0 | 0 | 0 | 0 | 2 | 1,087.08 | 104 | 122 | FALSE | IP00007752                       |
| 20120641 | law | law3 | law3 | law3 (F098 Tubulin beta chain                        | IP0101911 | human | 49,670.00 | 100.00% | 23 | 23 | 23 | 10.20% | 56.10% | IMMTFSVPPSK         | R | V | 95.00% | 85.4 | 38.4 | 73.2 | 0 | 0 | 0 | 0 | 2 | 1,319.70 | 163 | 174 | TRUE  | IP00007752                       |
| 20120641 | law | law3 | law3 | law3 (F098 Tubulin beta chain                        | IP0101911 | human | 49,670.00 | 100.00% | 23 | 23 | 23 | 10.20% | 56.10% | ISEGTFAMFR          | R | R | 95.00% | 55.4 | 38.6 | 37.5 | 0 | 0 | 0 | 0 | 2 | 1,245.59 | 381 | 390 | TRUE  | IP00007752                       |
| 20120641 | law | law3 | law3 | law3 (F098 Tubulin beta chain                        | IP0101911 | human | 49,670.00 | 100.00% | 23 | 23 | 23 | 10.20% | 56.10% | ISQVDFWCFPIGK       | R | R | 95.00% | 69.8 | 38.1 | 60.3 | 0 | 0 | 0 | 0 | 2 | 1,301.64 | 47  | 58  | TRUE  | IP00007752                       |
| 20120641 | law | law3 | law3 | law3 (F098 Tubulin beta chain                        | IP0101911 | human | 49,670.00 | 100.00% | 23 | 23 | 23 | 10.20% | 56.10% | KLVANNVFFRR         | R | L | 95.00% | 50.8 | 38.3 | 39.3 | 0 | 0 | 0 | 0 | 2 | 1,271.73 | 252 | 262 | TRUE  | IP00007752                       |
| 20120641 | law | law3 | law3 | law3 (F098 Tubulin beta chain                        | IP0101911 | human | 49,670.00 | 100.00% | 23 | 23 | 23 | 10.20% | 56.10% | LAVNNVFFRR          | K | L | 95.00% | 65.7 | 38.7 | 55.5 | 0 | 0 | 0 | 0 | 2 | 1,159.63 | 253 | 262 | TRUE  | IP00007752                       |
| 20120641 | law | law3 | law3 | law3 (F098 Tubulin beta chain                        | IP0101911 | human | 49,670.00 | 100.00% | 23 | 23 | 23 | 10.20% | 56.10% | LHFFMFGAFTSR        | R | G | 95.00% | 57.5 | 37.8 | 45.1 | 0 | 0 | 0 | 0 | 2 | 1,636.83 | 263 | 276 | TRUE  | IP00007752                       |
| 20120641 | law | law3 | law3 | law3 (F098 Tubulin beta chain                        | IP0101911 | human | 49,670.00 | 100.00% | 23 | 23 | 23 | 10.20% | 56.10% | LTPVDFEYK           | R | H | 95.00% | 84.4 | 38.4 | 68   | 0 | 0 | 0 | 0 | 2 | 1,798.34 | 217 | 241 | FALSE | IP00007752                       |
| 20120641 | law | law3 | law3 | law3 (F098 Tubulin beta chain                        | IP0101911 | human | 49,670.00 | 100.00% | 23 | 23 | 23 | 10.20% | 56.10% | MAYTFGNSTAEIQLK     | K | R | 95.00% | 143  | 37.7 | 107  | 0 | 0 | 0 | 0 | 2 | 1,885.97 | 363 | 379 | TRUE  | IP00007752                       |
| 20120641 | law | law3 | law3 | law3 (F098 Tubulin beta chain                        | IP0101911 | human | 49,670.00 | 100.00% | 23 | 23 | 23 | 10.20% | 56.10% | MAYTFGNSTAEIQLK     | K | I | 95.00% |      |      |      |   |   |   |   |   |          |     |     |       |                                  |

|          |     |      |                                                                 |           |          |           |         |   |    |    |       |        |                 |   |   |        |      |      |      |   |   |   |   |   |          |     |     |       |
|----------|-----|------|-----------------------------------------------------------------|-----------|----------|-----------|---------|---|----|----|-------|--------|-----------------|---|---|--------|------|------|------|---|---|---|---|---|----------|-----|-----|-------|
| 20120641 | law | law4 | law4 [F098 Heterogeneous nuclear ribonucleoprotein F]           | IP000038E | IP human | 45,671.90 | 99.90%  | 2 | 2  | 2  | 0.99% | 6.27%  | VHEIGPDGR       | R | V | 95.00% | 44.7 | 38.5 | 36.6 | 0 | 1 | 0 | 0 | 2 | 1,092.58 | 317 | 326 | TRUE  |
| 20120641 | law | law4 | law4 [F098 Actin, cytoplasmic 1]                                | IP000214E | IP human | 41,737.80 | 100.00% | 4 | 4  | 4  | 1.98% | 12.50% | AGFAGDQAPR      | K | A | 94.90% | 40.2 | 38.8 | 19.7 | 0 | 1 | 0 | 0 | 2 | 976.4484 | 19  | 28  | TRUE  |
| 20120641 | law | law4 | law4 [F098 Actin, cytoplasmic 1]                                | IP000214E | IP human | 41,737.80 | 100.00% | 4 | 4  | 4  | 1.98% | 12.50% | YSFTTFAIR       | K | E | 95.00% | 42.3 | 38.6 | 33.5 | 0 | 1 | 0 | 0 | 2 | 1,132.53 | 197 | 206 | TRUE  |
| 20120641 | law | law4 | law4 [F098 Actin, cytoplasmic 1]                                | IP000214E | IP human | 41,737.80 | 100.00% | 4 | 4  | 4  | 1.98% | 12.50% | SYELPDGQVYGNMER | K | F | 95.00% | 62   | 37.7 | 49.8 | 0 | 1 | 0 | 0 | 2 | 1,790.89 | 239 | 254 | TRUE  |
| 20120641 | law | law4 | law4 [F098 Keratin, type I cytoskeletal 10]                     | IP000098E | IP human | 58,288.80 | 100.00% | 4 | 4  | 4  | 1.98% | 7.02%  | DAEAFWENK       | K | S | 92.00% | 37.3 | 37.8 | 20.9 | 0 | 1 | 0 | 0 | 2 | 1,385.55 | 166 | 167 | TRUE  |
| 20120641 | law | law4 | law4 [F098 Keratin, type I cytoskeletal 10]                     | IP000098E | IP human | 58,288.80 | 100.00% | 4 | 4  | 4  | 1.98% | 7.02%  | SYQVELAQR       | R | K | 95.00% | 65.8 | 38.2 | 52.6 | 0 | 1 | 0 | 0 | 2 | 1,365.64 | 323 | 333 | TRUE  |
| 20120641 | law | law4 | law4 [F098 Keratin, type I cytoskeletal 10]                     | IP000098E | IP human | 58,288.80 | 100.00% | 4 | 4  | 4  | 1.98% | 7.02%  | AGVLELTKR       | R | A | 95.00% | 49.4 | 38.4 | 45.4 | 0 | 1 | 0 | 0 | 2 | 1,031.10 | 266 | 276 | TRUE  |
| 20120641 | law | law4 | law4 [F098 Keratin, type I cytoskeletal 18]                     | IP000547E | IP human | 48,059.00 | 100.00% | 7 | 7  | 7  | 3.47% | 15.10% | AGFANFYVADR     | K | I | 95.00% | 93.4 | 38.4 | 77.5 | 0 | 1 | 0 | 0 | 2 | 1,335.67 | 138 | 149 | TRUE  |
| 20120641 | law | law4 | law4 [F098 Keratin, type I cytoskeletal 18]                     | IP000547E | IP human | 48,059.00 | 100.00% | 7 | 7  | 7  | 3.47% | 15.10% | AQYDELAR        | K | K | 95.00% | 43.3 | 38.3 | 15.4 | 0 | 1 | 0 | 0 | 2 | 965.4887 | 254 | 261 | TRUE  |
| 20120641 | law | law4 | law4 [F098 Keratin, type I cytoskeletal 18]                     | IP000547E | IP human | 48,059.00 | 100.00% | 7 | 7  | 7  | 3.47% | 15.10% | ASLNSLR         | K | E | 95.00% | 52.9 | 39.2 | 30.8 | 0 | 1 | 0 | 0 | 2 | 889.4737 | 318 | 325 | TRUE  |
| 20120641 | law | law4 | law4 [F098 Keratin, type I cytoskeletal 18]                     | IP000547E | IP human | 48,059.00 | 100.00% | 7 | 7  | 7  | 3.47% | 15.10% | ATLQALNLR       | K | E | 95.00% | 44.1 | 37.8 | 28.2 | 0 | 1 | 0 | 0 | 2 | 1,106.44 | 482 | 491 | TRUE  |
| 20120641 | law | law4 | law4 [F098 Keratin, type I cytoskeletal 18]                     | IP000547E | IP human | 48,059.00 | 100.00% | 7 | 7  | 7  | 3.47% | 15.10% | IRHELEK         | K | K | 95.00% | 39.7 | 37.7 | 66.3 | 0 | 1 | 0 | 0 | 2 | 924.5262 | 112 | 118 | TRUE  |
| 20120641 | law | law4 | law4 [F098 Keratin, type I cytoskeletal 18]                     | IP000547E | IP human | 48,059.00 | 100.00% | 7 | 7  | 7  | 3.47% | 15.10% | YVLDNDR         | R | L | 95.00% | 53.6 | 37.9 | 28.3 | 0 | 1 | 0 | 0 | 2 | 1,041.61 | 150 | 158 | TRUE  |
| 20120641 | law | law4 | law4 [F098 Keratin, type I cytoskeletal 18]                     | IP000547E | IP human | 48,059.00 | 100.00% | 7 | 7  | 7  | 3.47% | 15.10% | QAEYVALLIK      | R | V | 95.00% | 86.2 | 38.4 | 66.7 | 0 | 1 | 0 | 0 | 2 | 1,402.72 | 359 | 370 | TRUE  |
| 20120641 | law | law4 | law4 [F098 Elongation factor 1-alpha 1]                         | IP000364E | IP human | 50,141.20 | 100.00% | 9 | 9  | 9  | 4.46% | 18.00% | EHALLATLVK      | R | Q | 95.00% | 65.9 | 38.1 | 52.1 | 0 | 1 | 0 | 0 | 2 | 1,314.74 | 135 | 146 | TRUE  |
| 20120641 | law | law4 | law4 [F098 Elongation factor 1-alpha 1]                         | IP000364E | IP human | 50,141.20 | 100.00% | 9 | 9  | 9  | 4.46% | 18.00% | EVSYTK          | K | K | 95.00% | 43.2 | 37.4 | 21.5 | 0 | 1 | 0 | 0 | 2 | 839.4509 | 173 | 179 | TRUE  |
| 20120641 | law | law4 | law4 [F098 Elongation factor 1-alpha 1]                         | IP000364E | IP human | 50,141.20 | 100.00% | 9 | 9  | 9  | 4.46% | 18.00% | IGGTFVPPVK      | K | V | 95.00% | 67.2 | 38   | 45.5 | 0 | 1 | 0 | 0 | 2 | 1,025.61 | 256 | 266 | TRUE  |
| 20120641 | law | law4 | law4 [F098 Elongation factor 1-alpha 1]                         | IP000364E | IP human | 50,141.20 | 100.00% | 9 | 9  | 9  | 4.46% | 18.00% | LFDQVDR         | R | I | 95.00% | 42   | 39.2 | 14.7 | 0 | 1 | 0 | 0 | 2 | 975.511  | 248 | 255 | TRUE  |
| 20120641 | law | law4 | law4 [F098 Elongation factor 1-alpha 1]                         | IP000364E | IP human | 50,141.20 | 100.00% | 9 | 9  | 9  | 4.46% | 18.00% | QTVAGVK         | R | A | 95.00% | 41.7 | 37.8 | 26.7 | 0 | 1 | 0 | 0 | 2 | 914.567  | 431 | 439 | TRUE  |
| 20120641 | law | law4 | law4 [F098 Elongation factor 1-alpha 1]                         | IP000364E | IP human | 50,141.20 | 100.00% | 9 | 9  | 9  | 4.46% | 18.00% | REYELK          | K | E | 95.00% | 46.6 | 38.1 | 15.7 | 0 | 1 | 0 | 0 | 2 | 936.5149 | 166 | 172 | TRUE  |
| 20120641 | law | law4 | law4 [F098 Elongation factor 1-alpha 1]                         | IP000364E | IP human | 50,141.20 | 100.00% | 9 | 9  | 9  | 4.46% | 18.00% | STTGHLLK        | K | C | 95.00% | 45.4 | 38.9 | 30.8 | 0 | 1 | 0 | 0 | 2 | 1,120.60 | 21  | 30  | TRUE  |
| 20120641 | law | law4 | law4 [F098 Elongation factor 1-alpha 1]                         | IP000364E | IP human | 50,141.20 | 100.00% | 9 | 9  | 9  | 4.46% | 18.00% | TIKFKK          | R | E | 95.00% | 41.1 | 38.3 | 38   | 0 | 1 | 0 | 0 | 2 | 894.4932 | 38  | 44  | TRUE  |
| 20120641 | law | law4 | law4 [F098 Elongation factor 1-alpha 1]                         | IP000364E | IP human | 50,141.20 | 100.00% | 9 | 9  | 9  | 4.46% | 18.00% | YYTIDAPGRH      | K | D | 95.00% | 62.8 | 38.2 | 45.6 | 0 | 1 | 0 | 0 | 2 | 1,404.73 | 85  | 96  | TRUE  |
| 20120641 | law | law4 | law4 [F098 DnaI homolog subfamily A member 1]                   | IP000125I | IP human | 44,868.60 | 100.00% | 4 | 5  | 5  | 2.48% | 12.80% | QSQWYSLDAK      | K | K | 95.00% | 106  | 38   | 91.9 | 0 | 1 | 0 | 0 | 2 | 1,451.74 | 47  | 59  | TRUE  |
| 20120641 | law | law4 | law4 [F098 DnaI homolog subfamily A member 1]                   | IP000125I | IP human | 44,868.60 | 100.00% | 4 | 5  | 5  | 2.48% | 12.80% | TVTSHSGQVK      | R | H | 95.00% | 59.6 | 38.1 | 42.1 | 0 | 1 | 0 | 0 | 2 | 1,392.82 | 284 | 296 | TRUE  |
| 20120641 | law | law4 | law4 [F098 DnaI homolog subfamily A member 1]                   | IP000125I | IP human | 44,868.60 | 100.00% | 4 | 5  | 5  | 2.48% | 12.80% | VNFPENGLSPDK    | K | L | 95.00% | 48.1 | 38.3 | 38   | 0 | 1 | 0 | 0 | 2 | 1,463.72 | 326 | 338 | TRUE  |
| 20120641 | law | law4 | law4 [F098 DnaI homolog subfamily A member 1]                   | IP000125I | IP human | 44,868.60 | 100.00% | 4 | 5  | 5  | 2.48% | 12.80% | VHFGVHEKKEK     | K | G | 95.00% | 35.6 | 34.7 | 26.6 | 0 | 1 | 0 | 0 | 2 | 1,427.66 | 33  | 41  | TRUE  |
| 20120641 | law | law4 | law4 [F098 elongation factor Tu, mitochondrial precursor]       | IP000272E | IP human | 49,875.40 | 100.00% | 5 | 5  | 5  | 2.48% | 13.40% | AGEDGNLQVDR     | K | G | 95.00% | 98.8 | 38.4 | 53.1 | 0 | 1 | 0 | 0 | 2 | 1,185.62 | 319 | 330 | TRUE  |
| 20120641 | law | law4 | law4 [F098 elongation factor Tu, mitochondrial precursor]       | IP000272E | IP human | 49,875.40 | 100.00% | 5 | 5  | 5  | 2.48% | 13.40% | ELTEFGYK        | R | G | 95.00% | 58.4 | 38.1 | 40.2 | 0 | 1 | 0 | 0 | 2 | 1,099.57 | 204 | 212 | TRUE  |
| 20120641 | law | law4 | law4 [F098 elongation factor Tu, mitochondrial precursor]       | IP000272E | IP human | 49,875.40 | 100.00% | 5 | 5  | 5  | 2.48% | 13.40% | GTTANQVHYSTVAAK | R | H | 95.00% | 38.8 | 37.9 | 27   | 0 | 1 | 0 | 0 | 2 | 1,073.86 | 108 | 123 | TRUE  |
| 20120641 | law | law4 | law4 [F098 elongation factor Tu, mitochondrial precursor]       | IP000272E | IP human | 49,875.40 | 100.00% | 5 | 5  | 5  | 2.48% | 13.40% | GLKGLTKLTKR     | R | C | 95.00% | 38.6 | 38.6 | 39   | 0 | 1 | 0 | 0 | 2 | 1,032.97 | 275 | 285 | TRUE  |
| 20120641 | law | law4 | law4 [F098 elongation factor Tu, mitochondrial precursor]       | IP000272E | IP human | 49,875.40 | 100.00% | 5 | 5  | 5  | 2.48% | 13.40% | LADVDVYPPVAK    | K | D | 95.00% | 94.7 | 38.2 | 77.5 | 0 | 1 | 0 | 0 | 2 | 1,542.85 | 242 | 255 | TRUE  |
| 20120641 | law | law5 | law5 [F098 isoform 1 of ClB domain-containing protein 1]        | IP002900I | IP human | 92,932.90 | 99.90%  | 2 | 2  | 2  | 1.12% | 2.27%  | LATEEPPRR       | K | S | 95.00% | 47.3 | 38.1 | 30.4 | 0 | 1 | 0 | 0 | 2 | 1,009.53 | 788 | 796 | TRUE  |
| 20120641 | law | law5 | law5 [F098 isoform 1 of ClB domain-containing protein 1]        | IP002900I | IP human | 92,932.90 | 99.90%  | 2 | 2  | 2  | 1.12% | 2.27%  | YLVAVVFR        | R | G | 95.00% | 46.3 | 37.5 | 36.8 | 0 | 1 | 0 | 0 | 2 | 1,067.90 | 457 | 466 | TRUE  |
| 20120641 | law | law5 | law5 [F098 Tubulin beta chain]                                  | IP001911I | IP human | 49,670.60 | 66.70%  | 1 | 1  | 1  | 0.56% | 2.03%  | YLVAVVFR        | R | G | 94.00% | 37   | 38   | 17.6 | 0 | 1 | 0 | 0 | 2 | 1,039.59 | 310 | 318 | TRUE  |
| 20120641 | law | law5 | law5 [F098 14-3-3 protein zeta/delta]                           | IP000212E | IP human | 27,745.90 | 99.80%  | 2 | 2  | 2  | 1.12% | 10.60% | DNDVNDLLEK      | R | F | 95.00% | 52.5 | 38.5 | 35.2 | 0 | 1 | 0 | 0 | 2 | 1,418.72 | 92  | 103 | TRUE  |
| 20120641 | law | law5 | law5 [F098 14-3-3 protein zeta/delta]                           | IP000212E | IP human | 27,745.90 | 99.80%  | 2 | 2  | 2  | 1.12% | 10.60% | SYFEGQHLSENER   | K | N | 95.00% | 107  | 38.1 | 95.4 | 0 | 1 | 0 | 0 | 2 | 1,548.71 | 28  | 29  | TRUE  |
| 20120641 | law | law5 | law5 [F098 40S ribosomal protein S3]                            | IP000112E | IP human | 26,688.60 | 99.80%  | 2 | 2  | 2  | 1.12% | 9.05%  | YVLEFSTR        | R | V | 95.00% | 54.7 | 38.5 | 36.4 | 0 | 1 | 0 | 0 | 2 | 1,095.57 | 49  | 27  | TRUE  |
| 20120641 | law | law5 | law5 [F098 40S ribosomal protein S3]                            | IP000112E | IP human | 26,688.60 | 99.80%  | 2 | 2  | 2  | 1.12% | 9.05%  | ELAEGSYGVEVR    | R | V | 95.00% | 78.2 | 38   | 65.3 | 0 | 1 | 0 | 0 | 2 | 1,423.67 | 28  | 40  | TRUE  |
| 20120641 | law | law5 | law5 [F098 Mitochondrial 2-oxoglutarate/malate carrier protein] | IP002197I | IP human | 34,063.20 | 99.90%  | 2 | 2  | 2  | 1.12% | 7.01%  | LTGADTTPPGLLK   | R | A | 95.00% | 55.3 | 38.3 | 38.8 | 0 | 1 | 0 | 0 | 2 | 1,386.76 | 109 | 122 | TRUE  |
| 20120641 | law | law5 | law5 [F098 Mitochondrial 2-oxoglutarate/malate carrier protein] | IP002197I | IP human | 34,063.20 | 99.90%  | 2 | 2  | 2  | 1.12% | 7.01%  | NGVLETKLTKR     | R | E | 95.00% | 45.6 | 38.7 | 26   | 0 | 1 | 0 | 0 | 2 | 908.4933 | 261 | 263 | TRUE  |
| 20120641 | law | law5 | law5 [F098 ADP/ATP translocase 2]                               | IP000071E | IP human | 32,853.50 | 100.00% | 9 | 10 | 10 | 5.62% | 25.50% | ANPFGTDAK       | R | G | 95.00% | 79   | 38.5 | 71.1 | 0 | 1 | 0 | 0 | 2 | 1,219.60 | 189 | 199 | TRUE  |
| 20120641 | law | law5 | law5 [F098 ADP/ATP translocase 2]                               | IP000071E | IP human | 32,853.50 | 100.00% | 9 | 10 | 10 | 5.62% | 25.50% | EGQVLSFWR       | K | G | 95.00% | 57.8 | 38.6 | 45   | 0 | 1 | 0 | 0 | 2 | 1,121.57 | 64  | 72  | TRUE  |
| 20120641 | law | law5 | law5 [F098 ADP/ATP translocase 2]                               | IP000071E | IP human | 32,853.50 | 100.00% | 9 | 10 | 10 | 5.62% | 25.50% | GNLANVIR        | R | Y | 95.00% | 46.7 | 37.5 | 26.8 | 0 | 1 | 0 | 0 | 2 | 856.4999 | 73  | 80  | FALSE |
| 20120641 | law | law5 | law5 [F098 ADP/ATP translocase 2]                               | IP000071E | IP human | 32,853.50 | 100.00% | 9 | 10 | 10 | 5.62% | 25.50% | LLVDVCHASK      | K | Q | 95.00% | 56.8 | 38.3 | 38.5 | 0 | 1 | 0 | 0 | 2 | 1,136.68 | 34  | 43  | TRUE  |
| 20120641 | law | law5 | law5 [F098 ADP/ATP translocase 2]                               | IP000071E | IP human | 32,853.50 | 100.00% | 9 | 10 | 10 | 5.62% | 25.50% | QFGLGVDK        | K | R | 95.00% | 67   | 38.5 | 46.8 | 0 | 1 | 0 | 0 | 2 | 976.5468 | 97  | 105 | FALSE |
| 20120641 | law | law5 | law5 [F098 ADP/ATP translocase 2]                               | IP000071E | IP human | 32,853.50 | 100.00% | 9 | 10 | 10 | 5.62% | 25.50% | QFGLGVDK        | K | R | 95.00% | 64.7 | 38.4 | 34.5 | 0 | 1 | 0 | 0 | 2 | 1,115.62 | 107 | 116 | TRUE  |
| 20120641 | law | law5 | law5 [F098 ADP/ATP translocase 2]                               | IP000071E | IP human | 32,853.50 | 100.00% | 9 | 10 | 10 | 5.62% | 25.50% | TAWPERK         | K | V | 95.00% | 58.1 | 37.5 | 32.8 | 0 | 1 | 0 | 0 | 2 | 856.4887 | 24  | 31  | TRUE  |
| 20120641 | law | law5 | law5 [F098 ADP/ATP translocase 2]                               | IP0       |          |           |         |   |    |    |       |        |                 |   |   |        |      |      |      |   |   |   |   |   |          |     |     |       |
