# Supplementary material for: CUB domain-containing protein 1 and the epidermal growth factor receptor cooperate to induce cell detachment
Source: Springer Nature journal article supplement (doi:10.1186/s13058-016-0741-1), 2016-08-05
Supplement: MOESM2 [file 10561622]

|                                                             | Accession Number | Molecular Mass | Total #of Unique Peptides | %Coverage |
|-------------------------------------------------------------|------------------|----------------|---------------------------|-----------|
| Tubulin beta chain                                          | IPI01019113      | 50 kDa         | 24                        | 56        |
| Tubulin alpha-1B chain                                      | IPI00930688      | 50 kDa         | 21                        | 47        |
| Isoform 1 of DNA-dependent protein kinase catalytic subunit | IPI00296337      | 469 kDa        | 14                        | 4         |
| Keratin, type II cytoskeletal 8                             | IPI00554648      | 54 kDa         | 10                        | 20        |
| Cytoplasmic dynein 1 heavy chain 1                          | IPI00456969      | 532 kDa        | 10                        | 3         |
| Keratin, type II cytoskeletal 1                             | IPI00220327      | 66 kDa         | 6                         | 3         |
| Keratin, type I cytoskeletal 18                             | IPI00554788      | 48 kDa         | 7                         | 15        |
| Isoform 1 of E3 ubiquitin-protein ligase TRIM21             | IPI00018971      | 54 kDa         | 8                         | 20        |
| Vimentin                                                    | IPI00418471      | 54 kDa         | 8                         | 18        |
| Tubulin beta-2C chain                                       | IPI00007752      | 50 kDa         | 4                         | 56        |
| Keratin, type I cytoskeletal 10                             | IPI00009865      | 59 kDa         | 5                         | 7         |
| Isoform 1 of Plectin                                        | IPI00014898      | 532 kDa        | 2                         | 1         |
| p62/Isoform 1 of Sequestosome-1                             | IPI00179473      | 48 kDa         | 4                         | 17        |
| Enigma/Isoform 1 of PDZ and LIM domain protein 7            | IPI00023122      | 50 kDa         | 4                         | 10        |
| Actin, cytoplasmic 1                                        | IPI00021439      | 42 kDa         | 4                         | 13        |
| Keratin, type II cytoskeletal 7                             | IPI00306959      | 51 kDa         | 4                         | 11        |
| Matrix metalloproteinase-14                                 | IPI00218398      | 66 kDa         | 2                         | 13        |
| 14-3-3 protein zeta/delta                                   | IPI00021263      | 28 kDa         | 2                         | 11        |
| Tubulin alpha-1A chain                                      | IPI00180675      | 50 kDa         | 2                         | 47        |
